# Supplementary material for: Validation of a Home Food Environment Instrument Assessing Household Food Patterning and Quality
Source: MDPI journal article supplement (doi:10.3390/nu13113930), 2021-11-03
Supplement: s1 [file s1]

**Table S1.** Estimated Home-IDEA2<sup>a</sup> and FoodAPS<sup>b</sup> HEI Component and Total Score Means at each Percentile

| Components               | Quality Score / |             | Percentiles <sup>c</sup> |                 |                  |                  |                  |                  |                  |                  |                  |
|--------------------------|-----------------|-------------|--------------------------|-----------------|------------------|------------------|------------------|------------------|------------------|------------------|------------------|
|                          | Tool            | Mean (SD)   | 1 <sup>st</sup>          | 5 <sup>th</sup> | 10 <sup>th</sup> | 25 <sup>th</sup> | 50 <sup>th</sup> | 75 <sup>th</sup> | 90 <sup>th</sup> | 95 <sup>th</sup> | 99 <sup>th</sup> |
| Total Vegetables         | Home-IDEA2      | 2.2 (2.0)   | 0.0                      | 0.0             | 0.0              | <b>0.0</b>       | 1.7              | <b>4.4</b>       | 5.0              | 5.0              | 5.0              |
|                          | FoodAPS         | 2.6 (1.9)   | 0.0                      | 0.0             | 0.0              | <b>0.7</b>       | 2.4              | <b>5.0</b>       | 5.0              | 5.0              | 5.0              |
| Greens & Beans/Peas      | Home-IDEA2      | 0.9 (1.9)   | 0.0                      | 0.0             | 0.0              | 0.0              | 0.0              | <b>0.0</b>       | 5.0              | 5.0              | 5.0              |
|                          | FoodAPS         | 1.4 (2.1)   | 0.0                      | 0.0             | 0.0              | 0.0              | 0.0              | <b>3.3</b>       | 5.0              | 5.0              | 5.0              |
| Total Fruit              | Home-IDEA2      | 2.6 (2.1)   | 0.0                      | 0.0             | 0.0              | <b>0.0</b>       | 2.8              | <b>5.0</b>       | 5.0              | 5.0              | 5.0              |
|                          | FoodAPS         | 2.2 (2.0)   | 0.0                      | 0.0             | 0.0              | <b>0.1</b>       | 1.7              | <b>4.5</b>       | 5.0              | 5.0              | 5.0              |
| Whole Fruit              | Home-IDEA2      | 2.7 (2.3)   | 0.0                      | 0.0             | 0.0              | 0.0              | 3.6              | 5.0              | 5.0              | 5.0              | 5.0              |
|                          | FoodAPS         | 2.3 (2.1)   | 0.0                      | 0.0             | 0.0              | 0.0              | 1.8              | 5.0              | 5.0              | 5.0              | 5.0              |
| Whole Grain              | Home-IDEA2      | 3.4 (4.1)   | 0.0                      | 0.0             | 0.0              | 0.0              | <b>0.0</b>       | 7.5              | <b>10.0</b>      | 10.0             | 10.0             |
|                          | FoodAPS         | 2.4 (3.4)   | 0.0                      | 0.0             | 0.0              | 0.0              | <b>0.3</b>       | 4.0              | <b>9.1</b>       | 10.0             | 10.0             |
| Total Dairy              | Home-IDEA2      | 6.2 (4.0)   | 0.0                      | 0.0             | 0.0              | 2.5              | 7.6              | <b>10.0</b>      | 10.0             | 10.0             | 10.0             |
|                          | FoodAPS         | 5.1 (3.8)   | 0.0                      | 0.0             | 0.0              | 1.2              | 4.9              | <b>9.5</b>       | 10.0             | 10.0             | 10.0             |
| Total Protein            | Home-IDEA2      | 3.1 (2.1)   | 0.0                      | 0.0             | 0.0              | 0.4              | 4.1              | 5.0              | 5.0              | 5.0              | 5.0              |
|                          | FoodAPS         | 2.8 (2.0)   | 0.0                      | 0.0             | 0.0              | 0.7              | 3.0              | 5.0              | 5.0              | 5.0              | 5.0              |
| Seafood & Plant Proteins | Home-IDEA2      | 1.5 (2.1)   | 0.0                      | 0.0             | 0.0              | 0.0              | <b>0.0</b>       | <b>4.0</b>       | 5.0              | 5.0              | 5.0              |
|                          | FoodAPS         | 1.9 (2.2)   | 0.0                      | 0.0             | 0.0              | 0.0              | <b>0.5</b>       | <b>5.0</b>       | 5.0              | 5.0              | 5.0              |
| Fatty Acid Ratio         | Home-IDEA2      | 4.4 (4.1)   | 0.0                      | 0.0             | 0.0              | <b>0.0</b>       | 3.6              | <b>9.8</b>       | 10.0             | 10.0             | 10.0             |
|                          | FoodAPS         | 4.9 (4.1)   | 0.0                      | 0.0             | 0.0              | <b>0.2</b>       | 4.6              | <b>10.0</b>      | 10.0             | 10.0             | 10.0             |
| Sodium                   | Home-IDEA2      | 8.0 (2.9)   | 0.0                      | <b>0.8</b>      | 3.1              | 6.7              | <b>10.0</b>      | 10.0             | 10.0             | 10.0             | 10.0             |
|                          | FoodAPS         | 6.7 (0.1)   | 0.0                      | <b>0.0</b>      | 0.0              | 3.7              | <b>8.6</b>       | 10.0             | 10.0             | 10.0             | 10.0             |
| Refined Grains           | Home-IDEA2      | 6.0 (4.1)   | 0.0                      | 0.0             | 0.0              | 1.7              | 7.4              | 10.0             | 10.0             | 10.0             | 10.0             |
|                          | FoodAPS         | 6.6 (3.9)   | 0.0                      | 0.0             | 0.0              | 3.4              | 8.6              | 10.0             | 10.0             | 10.0             | 10.0             |
| SoFAAS <sup>d</sup>      | Home-IDEA2      | 14.3 (6.5)  | 0.0                      | 0.0             | <b>2.8</b>       | 10.5             | 16.5             | <b>20.0</b>      | 20.0             | 20.0             | 20.0             |
|                          | FoodAPS         | 10.9 (7.3)  | 0.0                      | 0.0             | <b>0.0</b>       | 4.3              | 11.6             | <b>18.2</b>      | 20.0             | 20.0             | 20.0             |
| Total Score              | Home-IDEA2      | 55.5 (15.7) | 19.3                     | 29.4            | 35.0             | 45.0             | 55.9             | 66.2             | 75.2             | 80.2             | 89.1             |
|                          | FoodAPS         | 49.8 (15.4) | 17.2                     | 25.7            | 30.1             | 38.8             | 49.5             | 60.2             | 70.0             | 76.2             | 84.9             |

<sup>a</sup> Home-IDEA2: Home Inventory Describing Eating and Activity, Version 2. HEI score calculated based on representative food codes and estimated edible grams.

<sup>b</sup> FoodAPS: National Food Acquisition and Purchase Survey. HEI score calculated based on full inventory of reported food codes and total edible grams.

<sup>c</sup> Bold numbers indicate that the lower or upper range appear at different percentiles.

<sup>d</sup> SoFAAS: Solid Fats, Alcohol, Added Sugars
